# Supplementary material for: New TiO2/DSAT Immobilization System for Photodegradation of Anionic and Cationic Dyes
Source: Hindawi journal article supplement (doi:10.1155/2015/232741), 2015-01-01
Supplement: f1 [file 232741.f1.pdf]

## Supplementary Figures

Figure 1: The curve for the degradation rate of RR4 over time with varies loading under; a) immobilized TiO<sub>2</sub>/DSAT system and b) suspension TiO<sub>2</sub> system.

Figure 2: The curve for the degradation rate of MB over time with varies loading under; a) immobilized TiO<sub>2</sub>/DSAT system and b) suspension TiO<sub>2</sub> system.

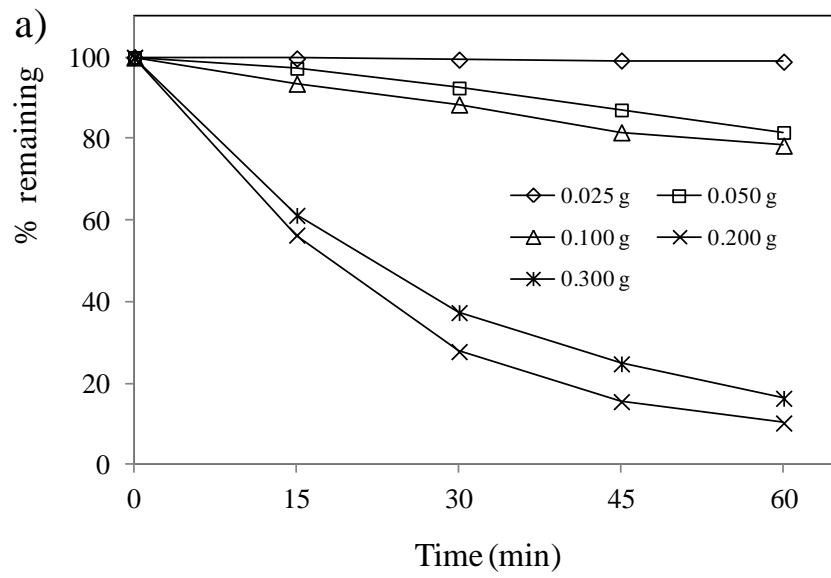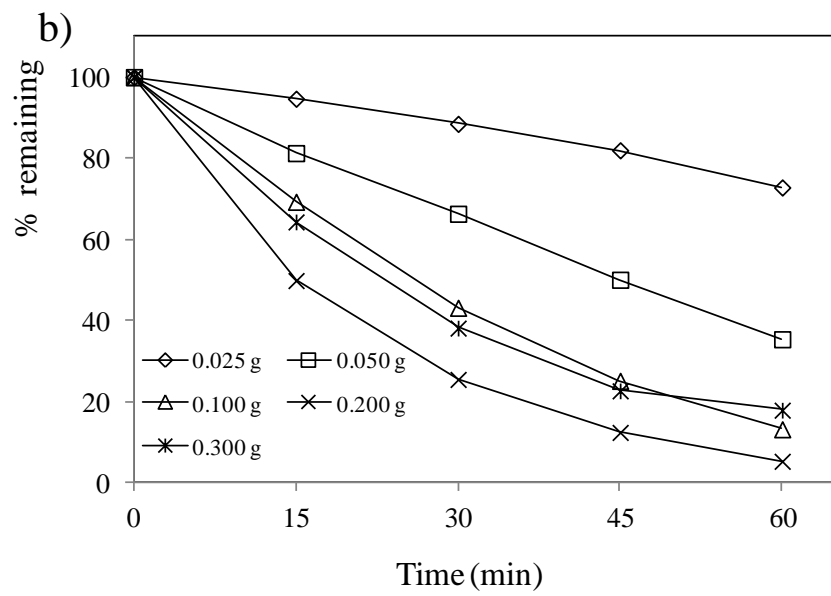

**Figure 1**

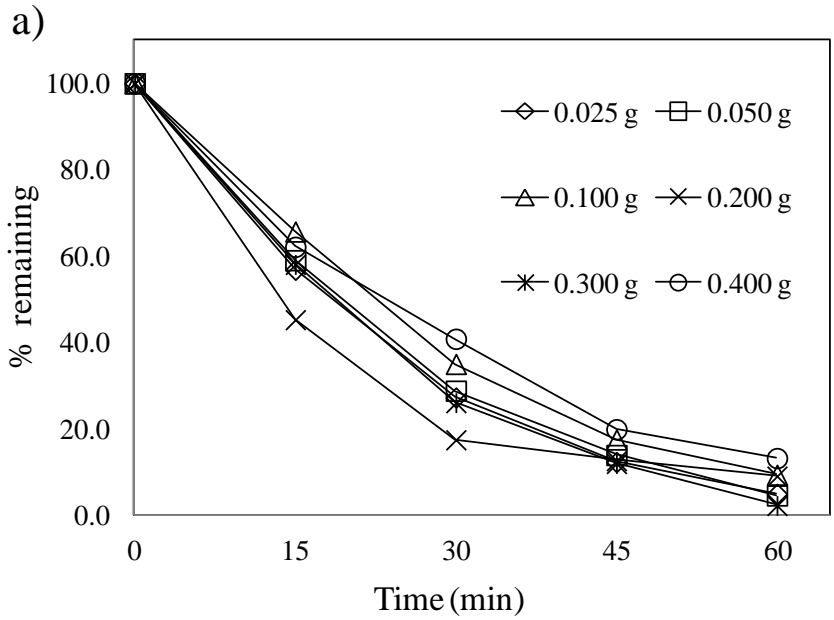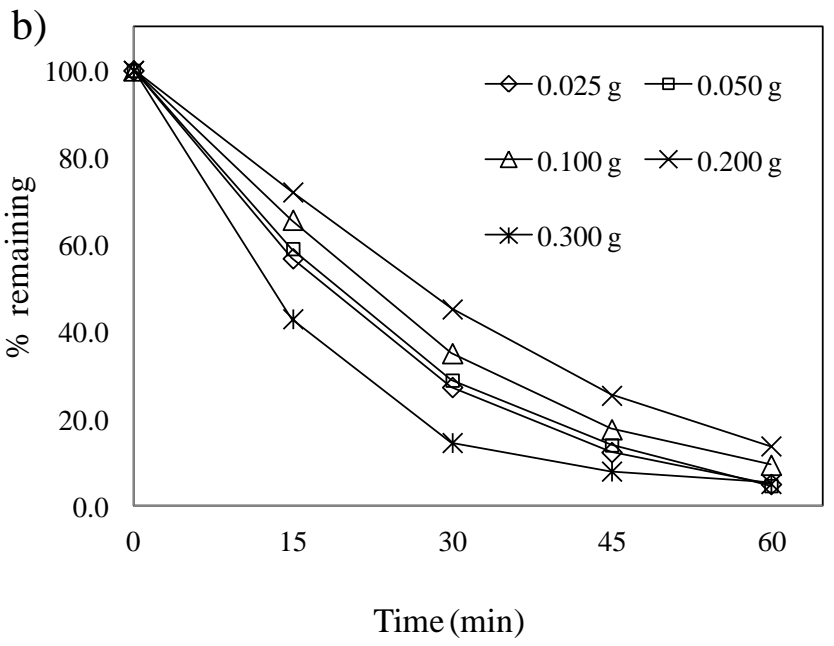

Figure 2
